# Supplementary material
Source: HighWire-hosted journal article supplement (https://bmjopen.bmj.com/content/11/2/e038902)
Supplement: inline-supplementary-material-4 [file inline-supplementary-material-4.pdf]

**Table 1. Characteristics of cohort studies of coffee consumption and prostate cancer risk included in the meta-analysis**

| Study              | Country | Study period | Age at baseline | Size of cohort/controls | No. of cases | Exposure assessment methods | Definition of coffee consumption                                                                                         | Outcome                                    | Follow-up time   | Confounder adjustments                                                                                                                                                                                                                                                       | NOS total quality score; Risk of bias (Potential bias)      |
|--------------------|---------|--------------|-----------------|-------------------------|--------------|-----------------------------|--------------------------------------------------------------------------------------------------------------------------|--------------------------------------------|------------------|------------------------------------------------------------------------------------------------------------------------------------------------------------------------------------------------------------------------------------------------------------------------------|-------------------------------------------------------------|
| Ong et al. 2019    | UK      | 2006-2010    | 37-73 years     | 131834                  | 7532         | Self-reported diet survey   | 1 cup/day increase; no information on the highest and lowest coffee intakes                                              | Total prostate cancer                      | <5 years         | Age, townsend deprivation index, top 10 ancestral principal components, smoking status, BMI, height, alcohol intake, drink temperature, overall health rating, highest qualification. Instrumental variable analyses (SNP instruments) were also used to control confounders | 7 stars; low risk of bias (exposure misclassification bias) |
| Sen et al. 2019    | Europe  | 1990s-2015   | Mean: 52 years. | 142196                  | 7036         | Validated FFQ               | The highest intake: median of 855 ml/day (no. of cases: 1271); The lowest intake: median of 0 ml/day (no. of cases: 396) | Total, Localized, advanced prostate cancer | Mean: 14 years   | Stratified by center and age at recruitment in 5 years categories, and adjusted for smoking status, BMI, history of diabetes, alcohol intake, education, physical activity, energy intake, as well as calcium, fish, tea, fruit and vegetable intake.                        | 9 stars; low risk of bias                                   |
| Pounis et al. 2017 | Italy   | 2005-2010    | ≥50 years;      | 6989                    | 100          | Validated FFQ               | The highest intake: >3 cups/day (>90                                                                                     | Total prostate cancer                      | Mean: 4.24 years | Age, energy intake, smoking habits and BMI                                                                                                                                                                                                                                   | 8 stars; low risk of bias                                   |

|                     |        |           | Mean:<br>67 years |        |      |                                      | g/day) (no. of<br>cases: 14);<br>The lowest intake:<br>0-2 cups/day (0-<br>55 g/day) (no. of<br>cases: 45)                                                  |                       |                  |                                                                                                                                           |                                                             |
|---------------------|--------|-----------|-------------------|--------|------|--------------------------------------|-------------------------------------------------------------------------------------------------------------------------------------------------------------|-----------------------|------------------|-------------------------------------------------------------------------------------------------------------------------------------------|-------------------------------------------------------------|
| Hashibe et al. 2015 | USA    | 1992-2011 | 55-74 years       | 46771  | 3037 | Validated diet history questionnaire | Mean coffee intake is 1.9 cups/day;<br>The highest intake: $\geq 2$ cups/day (no. of cases: 1731);<br>The lowest intake: $< 1$ cups/day (no. of cases: 889) | Total prostate cancer | $> 10$ years     | Age, sex, race, and education.                                                                                                            | 8 stars; low risk of bias (confounding bias)                |
| Tverdal et al. 2015 | Norway | 1974-1999 | 20-69 years       | 224234 | 5740 | Questionnaire                        | The highest intake: $\geq 9$ cups/day (no. of cases: 642);<br>The lowest intake: none (no. of cases: 389)                                                   | Total prostate cancer | Mean: 17.6 years | Age, smoking, BMI, height, physical activity, total cholesterol, triglycerides, systolic blood pressure, year of examination and diabetes | 8 stars; low risk of bias (exposure misclassification bias) |
| Li et al. 2013      | Japan  | 1995-2005 | 40-79 years       | 18,853 | 318  | Validated FFQ                        | The highest intake: $\geq 3$                                                                                                                                | Total prostate cancer | 11 years         | Age, education, BMI, time engaging in sports or exercise, marital status, time spent walking,                                             | 8 stars; low risk of bias                                   |

|                         |        |           |                      |         |       |                                 |                                                                                                                                                                                                                                                          |                                                  |                                |                                                                                                                                                                                                  |                                                             |
|-------------------------|--------|-----------|----------------------|---------|-------|---------------------------------|----------------------------------------------------------------------------------------------------------------------------------------------------------------------------------------------------------------------------------------------------------|--------------------------------------------------|--------------------------------|--------------------------------------------------------------------------------------------------------------------------------------------------------------------------------------------------|-------------------------------------------------------------|
| Discacciati et al. 2013 | Sweden | 1998-2010 | 45-79 years          | 44,613  | 3801  | Validated self-administered FFQ | <p>cups/day (no. of cases: 24);<br/>The lowest intake: none (no. of cases: 84)</p> <p>The highest intake: <math>\geq 6</math> cups/day (median of 1484 g/day) (no. of cases: 173);<br/>The lowest intake: none (median: 0 g/day) (no. of cases: 129)</p> | Localized and advanced prostate cancer incidence | 13 years                       | Age, tea, alcohol, BMI, diabetes, family history of prostate cancer, smoke, physical activity, education, total energy intake.                                                                   | 8 stars; low risk of bias                                   |
| Bosire et al. 2013      | USA    | 1995-2008 | 50-71 years          | 288,391 | 23335 | Validated FFQ                   | <p>The highest intake: <math>\geq 6</math> cups/day (no. of cases: 787);<br/>The lowest intake: none (no. of cases: 2136)</p>                                                                                                                            | Total prostate cancer incidence                  | >11 years (median: 10.5 years) | Age, race, height, BMI, physical activity, smoking, history of diabetes, family history of prostate cancer, PSA testing, intakes of tomato sauce, alpha-linolenic acid, and total energy intake. | 8 stars; low risk of bias                                   |
| Shafique et al. 2012    | UK     | 1970-2007 | 21-75 years (median) | 6017    | 318   | Self-administered questionnaire | <p>The highest intake: <math>\geq 3</math> cups/day (no. of cases: 65);</p>                                                                                                                                                                              | Total prostate cancer incidence                  | 37 years (median: 28 years)    | Age at screening, cholesterol, systolic blood pressure, BMI, alcohol intake, tea consumption, smoking status, social class.                                                                      | 8 stars; low risk of bias (exposure misclassification bias) |

|                        |        |           |                                             |        |      |                                           |                                                                                                                               |                                          |                                  |                                                                                                                                                                                                                                                                                                                                                                               |                                                                                           |
|------------------------|--------|-----------|---------------------------------------------|--------|------|-------------------------------------------|-------------------------------------------------------------------------------------------------------------------------------|------------------------------------------|----------------------------------|-------------------------------------------------------------------------------------------------------------------------------------------------------------------------------------------------------------------------------------------------------------------------------------------------------------------------------------------------------------------------------|-------------------------------------------------------------------------------------------|
|                        |        |           | : 48<br>years)                              |        |      |                                           | The lowest intake:<br>none (no. of<br>cases: 139)                                                                             |                                          |                                  |                                                                                                                                                                                                                                                                                                                                                                               |                                                                                           |
| Wilson et al.<br>2011  | USA    | 1986-2006 | 40-75<br>years                              | 47,911 | 5035 | Validated<br>FFQ                          | The highest<br>intake: $\geq 6$<br>cups/day (no. of<br>cases: 152);<br>The lowest intake:<br>none (no. of<br>cases: 587)      | Total<br>prostate<br>cancer<br>incidence | 20 years                         | Age in months, calendar time,<br>race, BMI at age 21, current BMI,<br>vigorous physical activity,<br>smoking, diabetes, family history<br>of prostate cancer in father or<br>brother, multivitamin use, intakes<br>of processed meat, tomato sauce,<br>calcium, alpha-linolenic acid,<br>supplemental vitamin E, alcohol<br>intake, energy intake, history of<br>PSA testing. | 9 stars; low risk<br>of bias                                                              |
| Nilsson et<br>al. 2010 | Sweden | 1985-2007 | 40-60<br>years<br>(median<br>: 50<br>years) | 30,930 | 653  | Validated<br>Semi-<br>quantitative<br>FFQ | The highest<br>intake: $\geq 4$<br>cups/day (no. of<br>cases: 209);<br>The lowest intake:<br><1 cup/day (no. of<br>cases: 60) | Total<br>prostate<br>cancer<br>incidence | 15 years<br>(median: 6<br>years) | Age, BMI, smoking, education,<br>recreational physical activity.                                                                                                                                                                                                                                                                                                              | 8 stars; low risk<br>of bias                                                              |
| Iso et al.<br>2007     | Japan  | 1988-1997 | 40-79<br>years                              | 43,500 | 161  | Self-<br>administrated<br>questionnaire   | The highest<br>intake: $\geq 2$<br>cups/day (no. of<br>cases: 38);                                                            | Prostate<br>cancer<br>mortality          | Mean:<br>8.15 years              | Age, area of study                                                                                                                                                                                                                                                                                                                                                            | 7 stars; low risk<br>of bias (exposure<br>misclassification<br>bias, confounding<br>bias) |

|                         |        |           |                                  |        |     |                                            |                                                                                                                                                                      |                                 |                             |                         |                                                                                  |
|-------------------------|--------|-----------|----------------------------------|--------|-----|--------------------------------------------|----------------------------------------------------------------------------------------------------------------------------------------------------------------------|---------------------------------|-----------------------------|-------------------------|----------------------------------------------------------------------------------|
| Ellison et al. 2000     | Canada | 1970-1993 | 50-84 years                      | 3400   | 145 | FFQ                                        | The lowest intake:<br>≤1-2 cup/month<br>(no. of cases: 47)<br>The highest intake: ≥750 mg/day (no. of cases: 122);<br>The lowest intake: 0 mg/day (no. of cases: 23) | Total prostate cancer incidence | Mean: 11.6 year             | Age, wine consumption.  | 6 stars; medium risk of bias (exposure misclassification bias, confounding bias) |
| Le Marchand et al. 1994 | USA    | 1975-1989 | ≥45 years                        | 20,316 | 198 | Self-administered life-style questionnaire | The highest intake: ≥2.5 cups/day;<br>The lowest intake: none.                                                                                                       | Total prostate cancer incidence | Median: 6 years             | Age, ethnicity, income. | 6 stars; medium risk of bias (exposure misclassification bias, confounding bias) |
| Hsing et al. 1990       | USA    | 1966-1986 | ≥35 years<br>(Median : 51 years) | 17,633 | 149 | FFQ                                        | The highest intake: ≥5 cups/day;<br>The lowest intake: <3 cups/day.                                                                                                  | Prostate cancer mortality       | 20 years (Mean: 15.6 years) | Age, tobacco use.       | 7 stars; low risk of bias (exposure misclassification bias, confounding bias)    |
| Severson et al. 1989    | USA    | 1965-1986 | 46-68 years                      | 7998   | 174 | FFQ + 24-h diet recall interview           | The highest intake: ≥5 cups/week (no. of cases: 146);                                                                                                                | Total prostate cancer incidence | Mean: 17.4 years            | Age                     | 7 stars; low risk of bias (confounding bias)                                     |

The lowest intake:

<1 cups/week (no.

of cases: 22)

---

BMI, body mass index; CI, confidence interval; FFQ, food frequency questionnaire; NA, not available; PSA, prostate-specific antigen; RR, relative risk;
